# Supplementary material
Source: PubMed Central journal article supplement (PMC1691833)

This is an electronic appendix to the paper by DeBruine 2004 Facial resemblance increases the attractiveness of same-sex faces more than other-sex faces. *Proc. R. Soc. Lond. B* **271**, 2085-2090. (doi:10.1098/rspb.2004.2824)

Electronic appendices are refereed with the text. However, no attempt is made to impose a uniform editorial style on the electronic appendices.

On the following page is a full-colour version of figure 1 from the printed version of the above paper.

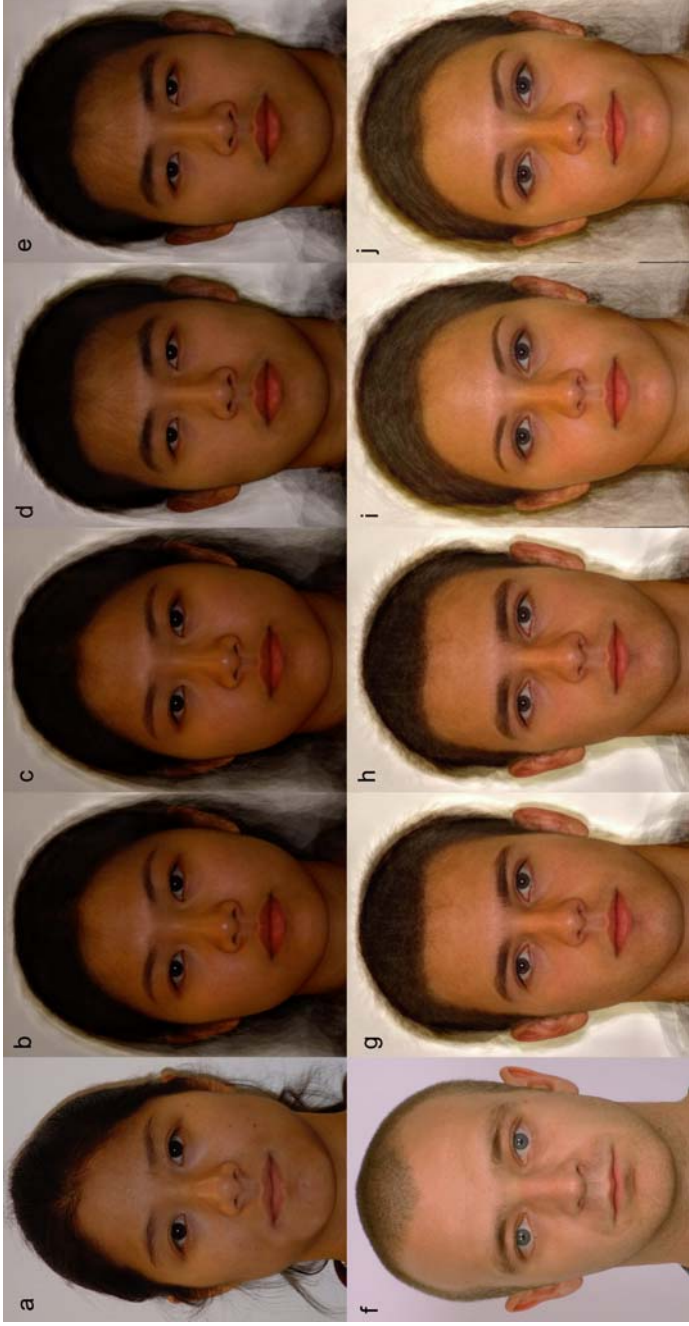

Supplement: 15451700s01.pdf [file 15451700s01.pdf]
